# Supplementary material for: Neural correlates of biased social fear learning and interaction in an intergroup context
Source: PubMed Central journal article supplement — Neuroimage. 2015 Nov 1;121:171–83. doi: 10.1016/j.neuroimage.2015.07.015 (PMC4686538; doi:10.1016/j.neuroimage.2015.07.015), 2015-11-01
Supplement: mmc1.pdf [file mmc1.pdf]

## Supplemental Information

### Neural correlates of biased social fear learning and interaction in an intergroup context

Tanaz Molapour, Armita Golkar, Carlos David Navarrete, Jan Haaker, Andreas Olsson

#### Contents of Supplemental Information

##### 1. Supplemental Figures

Figure S1. *RFX Plot: Overall activity split in three time bins during Acquisition.*

Figure S2. *SCR Plot over Trials: Habituation.*

Figure S3. *SCR Plot over Trials: Acquisition.*

Figure S4. *SCR Plot over Trials: Recall.*

##### 2. Supplemental Table

Table S1. gPPI connectivity analysis

#### Supplemental Figures

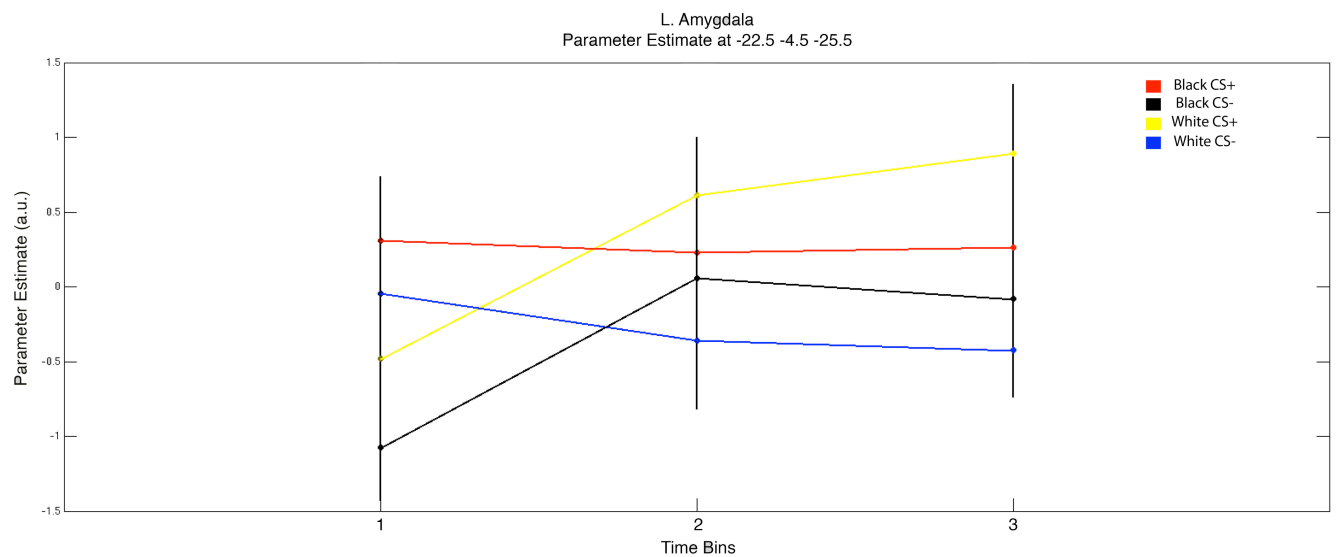

**Figure S1.** *RFX Plot: Overall activity split in three time bins based on trial numbers.* RFX Plot shows the contrast estimates plot in three time bins from the significant peak of activation in the left amygdala for the contrast (CR White > CR Black) during Acquisition stage. Time bin 1= trial 1-3, time bin 2= trial 4-6, time bin 3= trial 7-9.

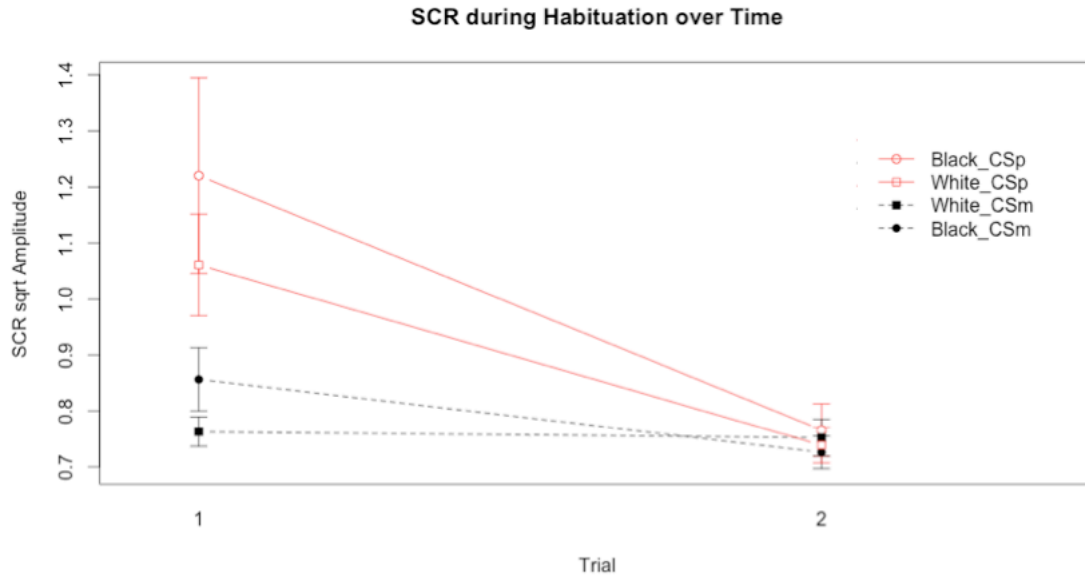

**Figure S2.** *SCR plot over Trials: Habituation.* The amplitude of SCRs is shown in microsiemens. Fear elicited enhanced SCRs to CSs during Habituation on Trial 1 as compared to Trial 2. Error bars indicate standard deviation (SEM). There is a significant decrease in SCRs to CS regardless of race or future “to-be CS+” from Trial 1 to Trial 2 ( $F(1,19) = 27.70, p < .001$ ).

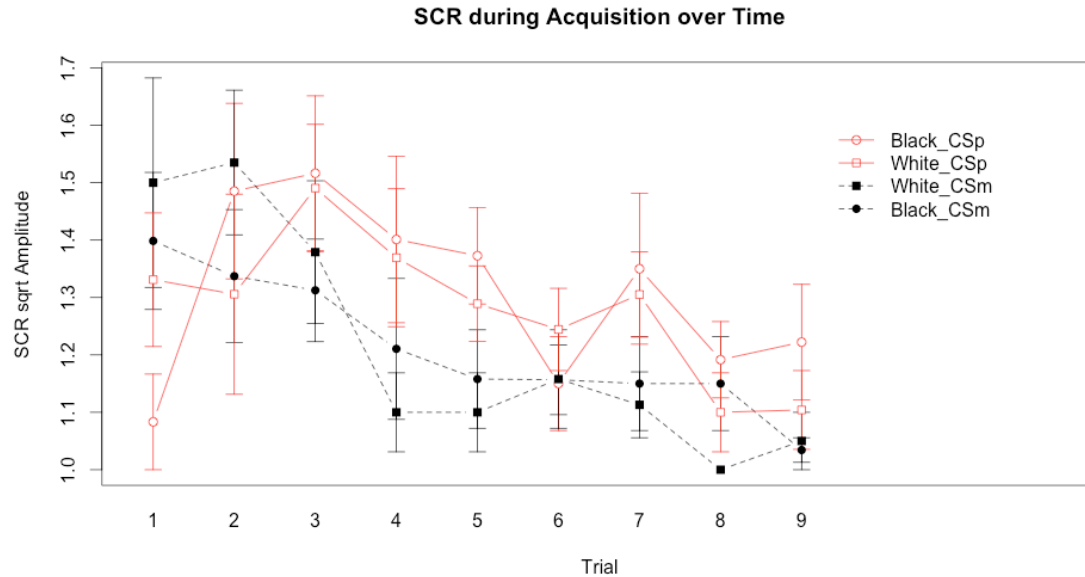

**Figure S3.** *SCR plot over Trials: Acquisition.* The amplitude of SCRs is shown in microsiemens for the SCRs to CSs during Acquisition across all 9 Trials. Error bars indicate standard deviation (SEM). A RM ANOVA with the factors CS (CS+, CS-), Race (Black, White), Trial (1-3, 4-6, 7-9) revealed a CS\*Race\*Trial interaction ( $F(2,38) = 4.97, p < .05$ ).

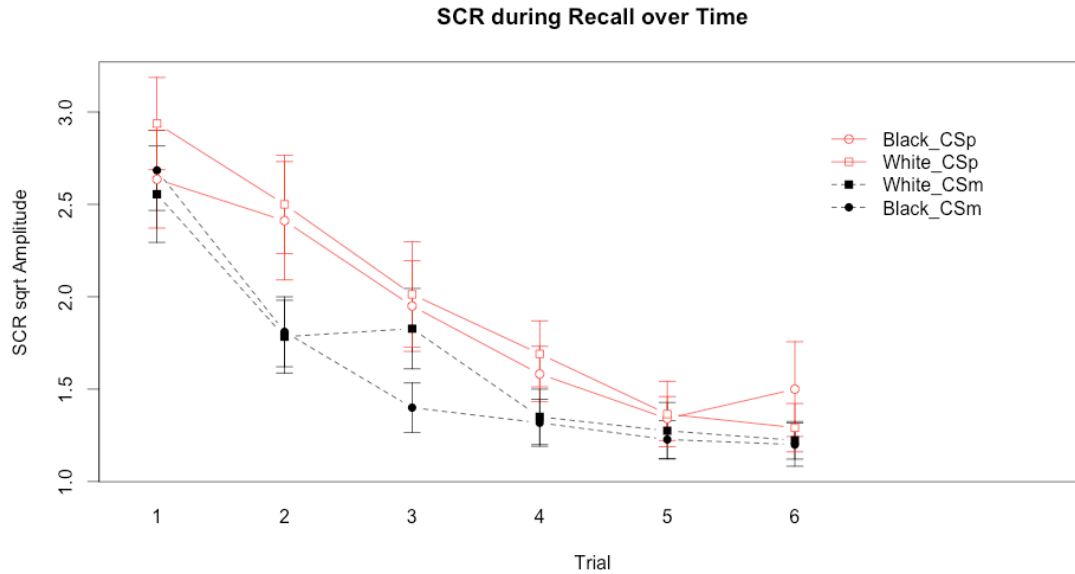

**Figure S4.** *SCR plot over Trials: Recall.* The amplitude of SCRs is shown in microsiemens. Fear elicited enhanced SCRs to CSs during Recall across all 6 Trials. Error bars indicate standard deviation (SEM). A RM ANOVA with the factors CS (CS+, CS-), Race (Black, White), Trial (1-2, 3-4, 5-6) revealed a significant effect of Trial ( $F(2,38) = 43.12, p < .001$ ).

**Table S1. gPPI connectivity analysis**

**EXPERIMENTAL STAGE**

*Analysis (Contrast)*

| Anatomical Region               | MNI x,y,z<br>(mm) | peak<br><i>t</i> | peak <i>p</i> (FWE-<br>corr) | K  |
|---------------------------------|-------------------|------------------|------------------------------|----|
| <b>ACQUISITION</b>              |                   |                  |                              |    |
| <i>(CR Black &gt; CR White)</i> |                   |                  |                              |    |
| Left Fusiform                   | -34 -12 -30       | 3.96             | <.001                        | 6  |
| Left Thalamus                   | -12 -12 -5        | 3.94             | <.001                        | 7  |
| Left precentral                 | -50 3 22          | 3.93             | <.001                        | 9  |
| <i>(CR White &gt; CR Black)</i> |                   |                  |                              |    |
| Right ParaHippocampal           | 24 -42 -3         | 3.94             | <.001                        | 3  |
| Left vmPFC                      | -12 42 1          | 3.91             | <.001                        | 13 |
| Left Insula                     | -26 20 -11        | 3.75             | 0.001                        | 1  |
| Right Lingual                   | 21 -75 1          | 3.7              | 0.001                        | 4  |
| Right middle temporal gyrus     | 51 -1 -17         | 3.69             | 0.001                        | 1  |
| Right Hippocampus               | 32 -42 1          | 3.67             | 0.001                        | 5  |
| <i>(Black &gt; White)</i>       |                   |                  |                              |    |
| Left Fusiform                   | -34 -10 -27       | 4.81             | <.001                        | 38 |
| Cerebelum_9_L                   | -12 -45 -35       | 4.07             | <.001                        |    |
| Left Thalamus                   | -21 -16 6         | 4.22             | <.001                        | 21 |

|                                     |             |      |       |     |
|-------------------------------------|-------------|------|-------|-----|
| Left superior frontal medial        | -12 60 21   | 3.94 | <.001 | 13  |
| <i>(White&gt;Black)</i>             |             |      |       |     |
| Right Hippocampus                   | 27 -43 -2   | 4.97 | <.001 | 178 |
| Right Hippocampus                   | 32 -39 4    | 4.68 | <.001 |     |
| Right Insula                        | 40 -12 -6   | 4.44 | <.001 | 29  |
| Right Thalamus                      | 15 -6 -5    | 4.43 | <.001 | 14  |
| Right Lingual                       | 22 -84 -5   | 4.04 | <.001 | 6   |
| Right Caudate                       | 21 -24 22   | 3.89 | <.001 | 10  |
| Cerebelum_4_5_L                     | -6 -42 -8   | 3.67 | 0.001 | 2   |
| Cerebelum_4_5_L                     | -4 -45 -6   | 3.63 | 0.001 | 1   |
| <b>EXTINCTION</b>                   |             |      |       |     |
| <i>(CR Black &gt; CR White)</i>     |             |      |       |     |
| Right Fusiform                      | 34 -9 -39   | 5.39 | 0.05* | 47  |
| Right anterior cingulum             | 8 6 27      | 4.7  | <.001 | 63  |
| Left superior temporal gyrus        | -36 -37 7   | 4.55 | <.001 | 19  |
| Right putamen                       | 27 -3 16    | 4.5  | <.001 | 29  |
| Left inferior parietal              | -45 -52 58  | 4.38 | <.001 | 12  |
| Left inferior temporal gyrus        | -42 -10 -35 | 4.37 | <.001 | 22  |
| Right middle frontal                | 38 42 -2    | 4.2  | <.001 | 19  |
| Left anterior cingulum              | -9 12 24    | 3.93 | <.001 | 10  |
| Right Thalamus                      | 3 -15 -0    | 3.87 | 0.001 | 22  |
| Right inferior parietal             | 39 -46 51   | 3.83 | 0.001 | 24  |
| Right middle frontal                | 51 44 1     | 3.73 | 0.001 | 10  |
| Right Thalamus                      | 20 -15 9    | 3.61 | 0.001 | 1   |
| <i>(CR White&gt; CR Black)</i>      |             |      |       |     |
| Right supplementary motor area      | 12 2 60     | 6.66 | <.001 | 394 |
| Left supplementary motor area       | -4 8 64     | 5.21 | <.001 |     |
| Left supplementary motor area       | 0 14 60     | 4.46 | <.001 |     |
| Left middle frontal                 | -27 45 24   | 4.36 | <.001 | 61  |
| Right middle cingulum               | 9 3 39      | 4.2  | <.001 | 17  |
| Cerebelum_4_5_R                     | 14 -48 -18  | 3.61 | 0.001 | 1   |
| <i>(Black&gt;White)</i>             |             |      |       |     |
| Right middle frontal                | 54 33 22    | 5.69 | <.001 | 75  |
| Right inferior parietal             | 42 -49 51   | 4.32 | <.001 | 86  |
| Left frontal inferior triangularis  | -44 36 -0   | 4.28 | <.001 | 56  |
| Left inferior orbitofrontal         | -39 42 -5   | 3.87 | 0.001 |     |
| Right inferior orbitofrontal        | 57 36 -3    | 4.19 | <.001 | 5   |
| Right middle temporal pole          | 38 16 -36   | 4.13 | <.001 | 14  |
| Right Thalamus                      | 4 -12 -0    | 4.01 | <.001 | 27  |
| Right frontal inferior triangularis | 46 44 -2    | 3.87 | 0.001 | 23  |
| Right frontal inferior triangularis | 58 33 -0    | 3.61 | 0.001 | 1   |
| <i>(White&gt;Black)</i>             |             |      |       |     |
| Right supplementary motor area      | 10 0 58     | 4.92 | <.001 | 95  |
| Left middle temporal gyrus          | -48 -45 -6  | 3.65 | 0.001 | 1   |

\*p &lt; 0.05, after SVC
